# Supplementary material for: Nonionic oligo(ethylene glycol)-substituted viologen negolytes for aqueous organic redox flow batteries
Source: Royal Society of Chemistry journal article supplement (doi:10.1039/d2ta09177a), 2023-01-01
Supplement: d2ta09177a1.pdf [file d2ta09177a1.pdf]

## Electronic Supplementary Information (ESI †)

### **Nonionic Oligo(ethylene glycol)-substituted Viologen Negolytes for Aqueous Organic Redox Flow Batteries**

*Yanxin Yao<sup>a</sup>, Wanzhen Ma<sup>b</sup>, Jiafeng Lei<sup>a</sup>, Zengyue Wang<sup>a</sup>, Yi-Chun Lu<sup>\*a</sup> and Lei Liu<sup>\*b</sup>*

a. Electrochemical Energy and Interfaces Laboratory, Department of Mechanical and Automation Engineering, The Chinese University of Hong Kong, Shatin, N.T. 999077, Hong Kong SAR, China. E-mail: yichunlu@mae.cuhk.edu.hk

b. College of Chemistry and Materials Science, Anhui Normal University, Wuhu 241000, China. E-mail: liulei@ahnu.edu.cn

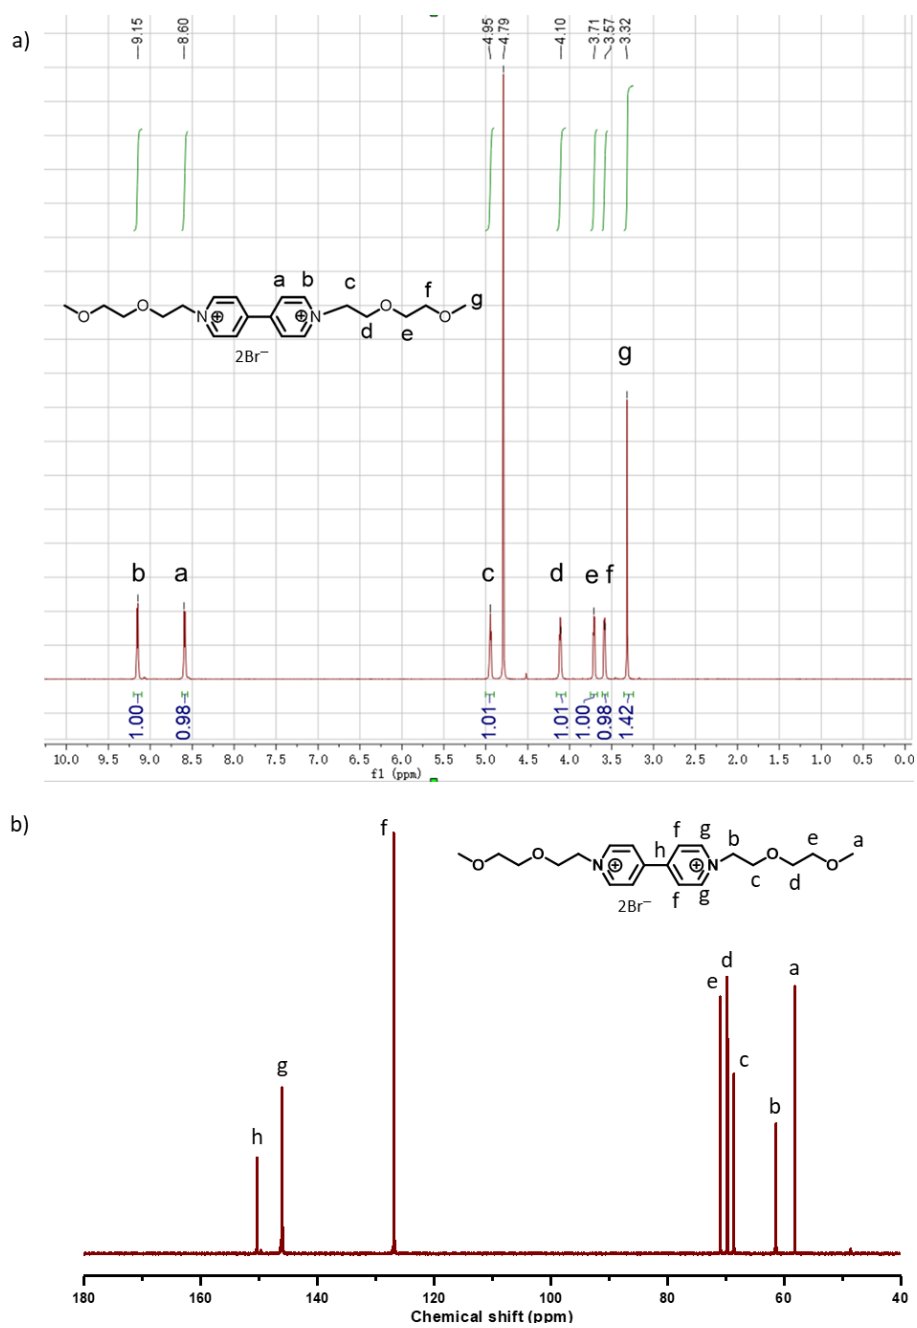

**Fig. S1**  $^1\text{H}$  NMR (a) and  $^{13}\text{C}$  NMR (b) spectra of Vi-OEG2 in  $\text{D}_2\text{O}$ .

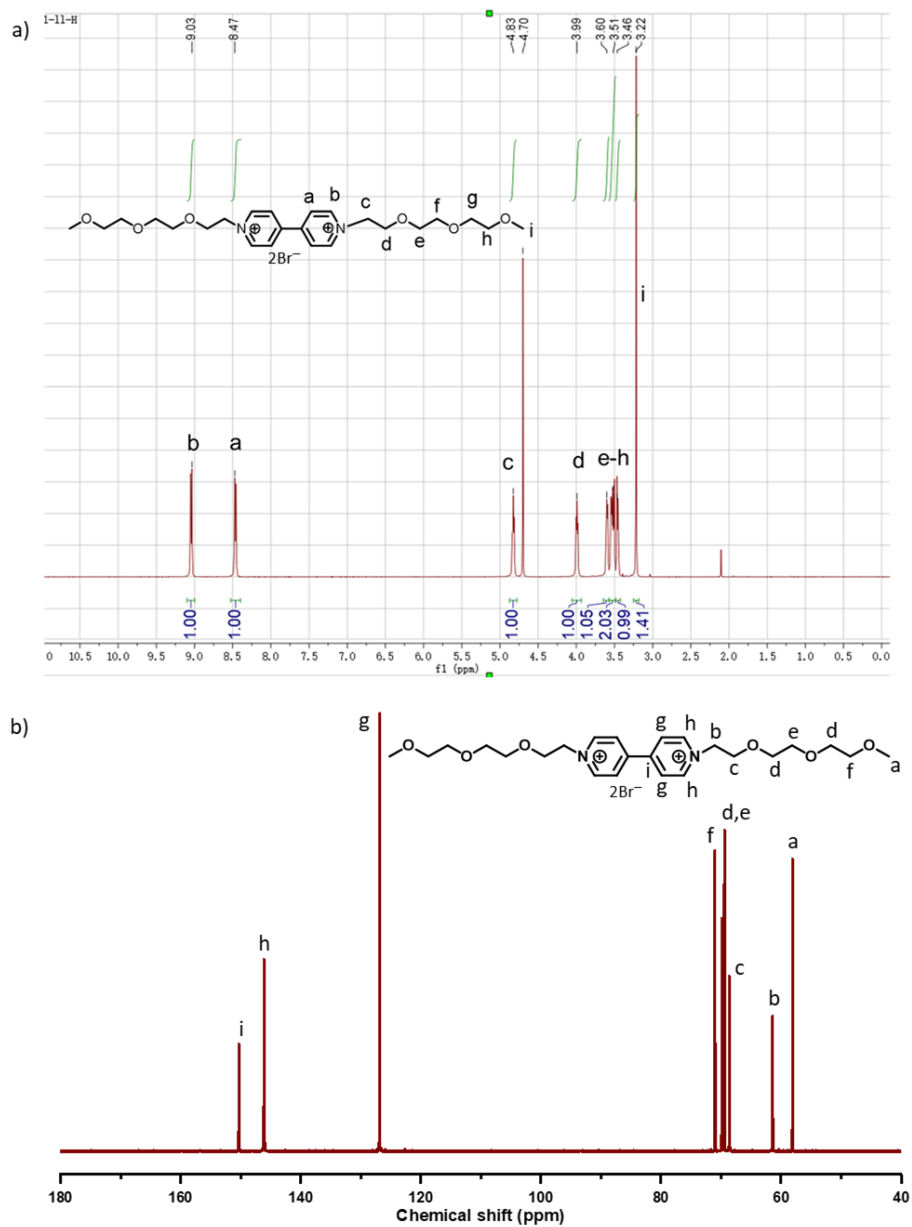

**Fig. S2** <sup>1</sup>H NMR (a) and <sup>13</sup>C NMR (b) spectra of Vi-OEG3 in D<sub>2</sub>O.

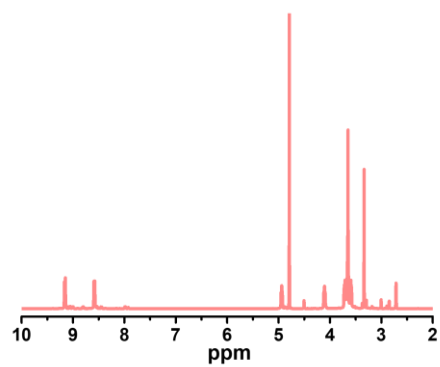

**Fig. S3** <sup>1</sup>H NMR of Vi-OEG4.

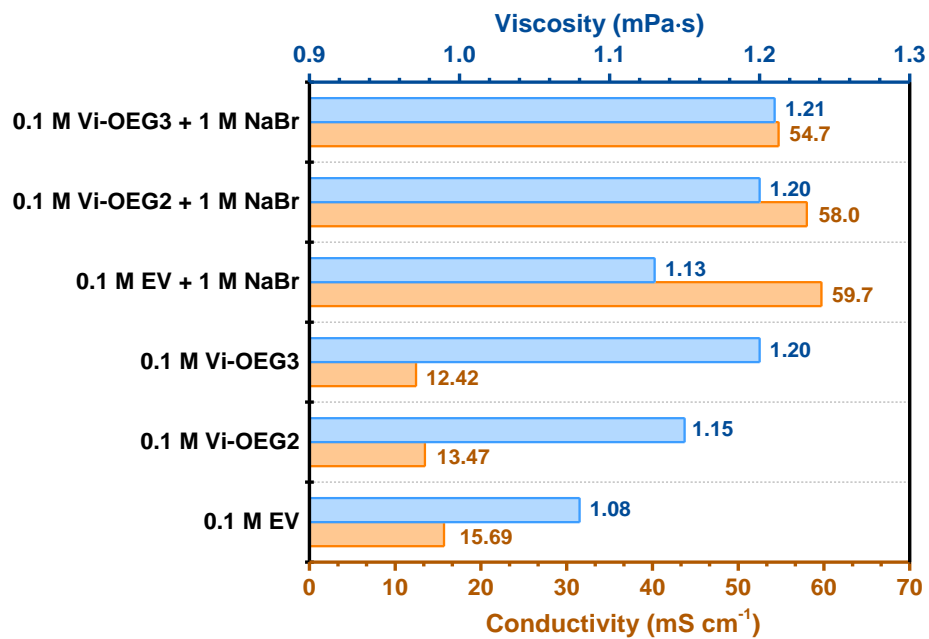

**Fig. S4** Conductivity and viscosity measurement of 0.1 M EV, Vi-OEG2 and Vi-OEG3 with and without 1 M NaBr.

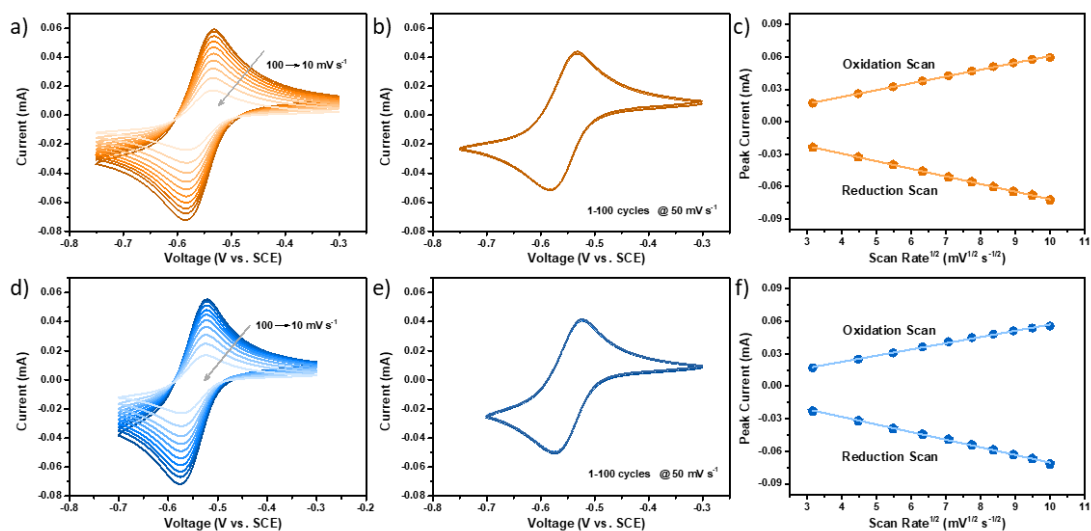

**Fig. S5** CV curves of (a) Vi-OEG2 and (d) Vi-OEG3 at different scanning rates from 10 to 100  $\text{mV s}^{-1}$ . CV curves of (b) Vi-OEG2 and (e) Vi-OEG3 at the 1<sup>st</sup>, 10<sup>th</sup>, 20<sup>th</sup>, . . . . ., 90<sup>th</sup>, and 100<sup>th</sup> cycles at 50  $\text{mV s}^{-1}$ . Linearly increased peak currents with the increased square root of scanning rates of (c) Vi-OEG2 and (f) Vi-OEG3. Solution: 5 mM Vi-OEG2 or Vi-OEG3 in 0.5 M NaBr.

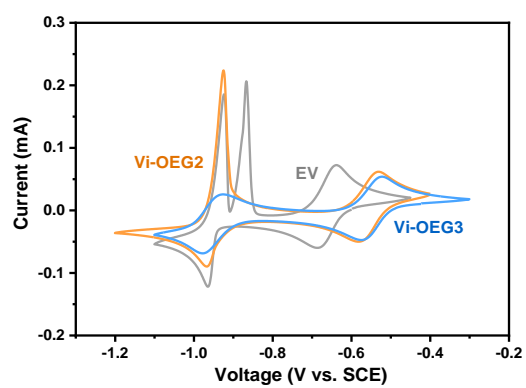

**Fig. S6** Cyclic voltammograms of EV, Vi-OEG2, and Vi-OEG3. Condition: 5 mM viologens in 0.5 M NaBr aqueous electrolyte at a scan rate of  $50 \text{ mV s}^{-1}$ .

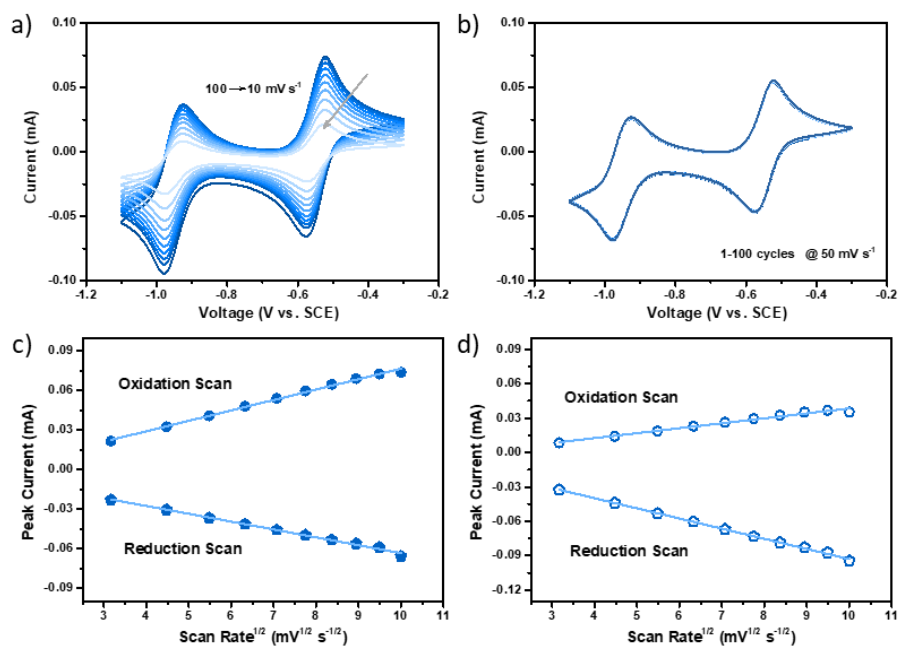

**Fig. S7** (a) CV curves of Vi-OEG3 at different scanning rates from 10 to 100  $\text{mV s}^{-1}$ . (b) CV curves of Vi-OEG3 at the 1<sup>st</sup>, 10<sup>th</sup>, 20<sup>th</sup>, ..., 90<sup>th</sup>, and 100<sup>th</sup> cycles at 50  $\text{mV s}^{-1}$ . Linearly increased peak currents with the increased square root of scanning rates of (c) the first-electron reduction and (d) the second-electron reduction of Vi-OEG3. Solution: 5 mM Vi-OEG3 in 0.5 M NaBr.



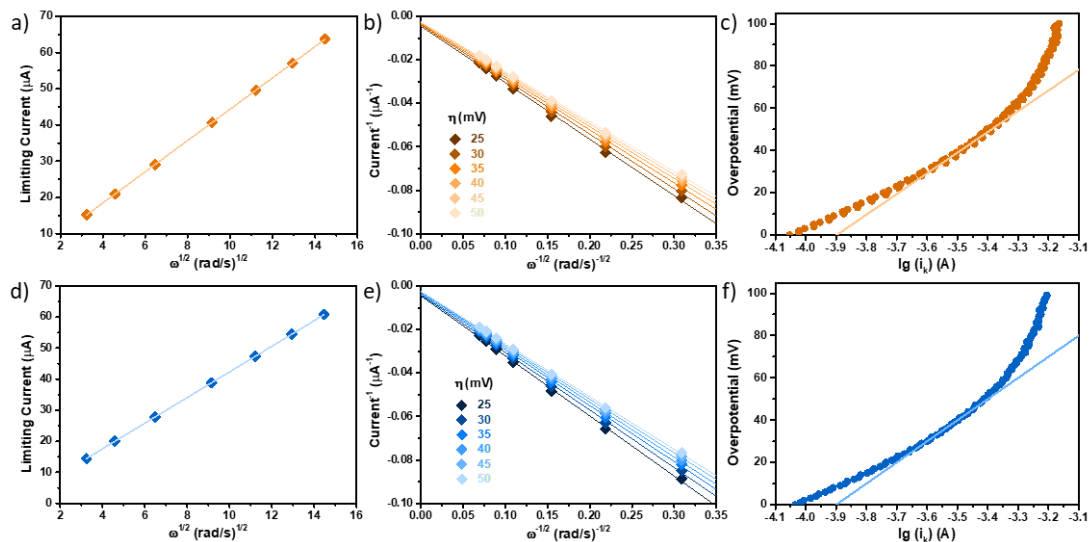

**Fig. S8** Levich plots of the limiting current vs. the square root of rotation rates for (a) Vi-OEG2 and (d) Vi-OEG3. Koutecký-Levich plot ( $i^{-1}$  vs.  $\omega^{-1/2}$ ) of (b) Vi-OEG2 and (e) Vi-OEG3. The current response,  $i^{-1}$ , is shown for different reduction overpotentials  $\eta$  ( $\eta = 25, 30, 35, 40, 45,$  and  $50$  mV). The plots of overpotentials over the logarithm of kinetic current and the corresponding fitted Tafel plot for (c) Vi-OEG2 and (f) Vi-OEG3. Condition: 1.0 mM Vi-OEG2 or Vi-OEG3 in 0.5 M NaCl at a scan rate of  $5 \text{ mV s}^{-1}$ .

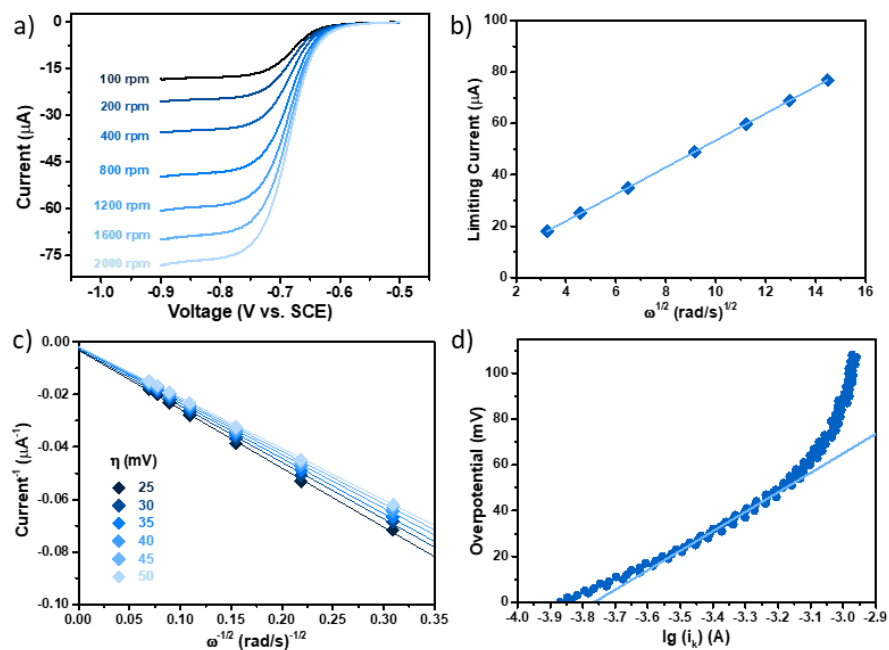

**Fig. S9** (a) Linear sweep voltammograms of EV. (b) Levich plots of the limiting current vs. the square root of rotation rates for EV. (c) Koutecký-Levich plot ( $i^{-1}$  vs.  $\omega^{-1/2}$ ) of EV. The current response,  $i^{-1}$ , is shown for different reduction overpotentials  $\eta$  ( $\eta = 25, 30, 35, 40, 45,$  and  $50$  mV). (d) The plots of overpotentials over the logarithm of kinetic current and the corresponding fitted Tafel plot for EV. Condition: 1.0 mM EV in 0.5 M NaCl at a scan rate of  $5 \text{ mV s}^{-1}$ .

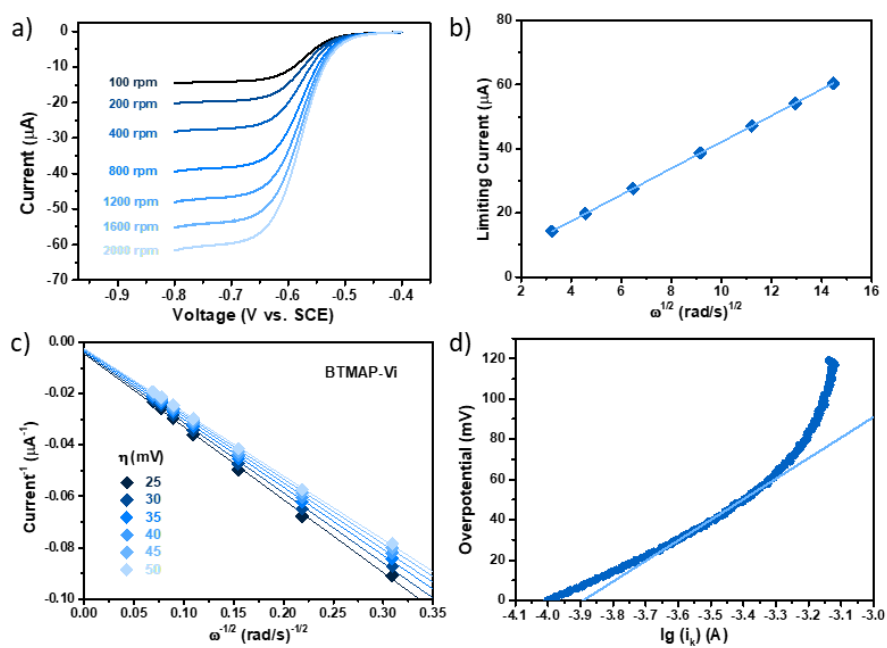

**Fig. S10** (a) Linear sweep voltammograms of BTMAP-Vi. (b) Levich plots of the limiting current vs. the square root of rotation rates for BTMAP-Vi. (c) Koutecký-Levich plot ( $i^{-1}$  vs.  $\omega^{-1/2}$ ) of BTMAP-Vi. The current response,  $i^{-1}$ , is shown for different reduction overpotentials  $\eta$  ( $\eta = 25, 30, 35, 40, 45,$  and  $50$  mV). (d) The plots of overpotentials over the logarithm of kinetic current and the corresponding fitted Tafel plot for BTMAP-Vi. Condition: 1.0 mM BTMAP-Vi in 0.5 M NaCl at a scan rate of  $5 \text{ mV s}^{-1}$ .

---

RRDE was further exploited to understand the redox processes of EV and Vi-OEG3. The disk and ring currents were recorded by negatively stepping the disk potential within a similar potential range to their CVs while holding the ring current at a positive potential to ensure that viologens are continuously oxidized. For EV, shown in **Fig. S11**, two diffusion-limiting disk current plateaus were observed during the negative-going scan. The first diffusion-limiting ring current plateau can be attributed to the reversible oxidation of  $EV^{*+}$  to  $EV^{2+}$ , consistent with the CV results. The ring current started to decrease as soon as the disk potential entered the second plateau and dropped to zero at the end of the second disk-limiting current (100 rpm). Noted that at higher rotation rates, the solid  $EV^0$  could be potentially thrown to the ring, resulting in weak ring currents. During the positive-going scan, after the disk potential entered the first plateau potential,  $EV^{*+}$  was generated from both the oxidation of deposited  $EV^0$  and the reduction of  $EV^{2+}$ , and thus the flux of  $EV^{*+}$  arriving at the ring increased. It should be noted that the oxidation currents of both disk and ring electrodes show two peaks at  $-0.93$  V vs. SCE and  $-0.86$  V vs. SCE at higher rotation rates (400 – 2000 rpm), which is consistent with the CV curves. This observation indicates that the reduction product of the second disk reaction ( $EV^0$ ) cannot be oxidized on the ring (insoluble) (**Fig. S11a**). In contrast, for Vi-OEG3 (**Fig. S12**), there were two diffusion-limiting current plateaus for both disk and ring during negative/positive-going scans, which suggests no passivation phenomenon during the two-electron redox reaction of Vi-OEG3. Thus, the RRDE experiment revealed that the second-electron redox reaction of Vi-OEG3 exhibits fast kinetics with high reversibility, which strongly contrasts with that of EV with passivation features.<sup>1</sup>

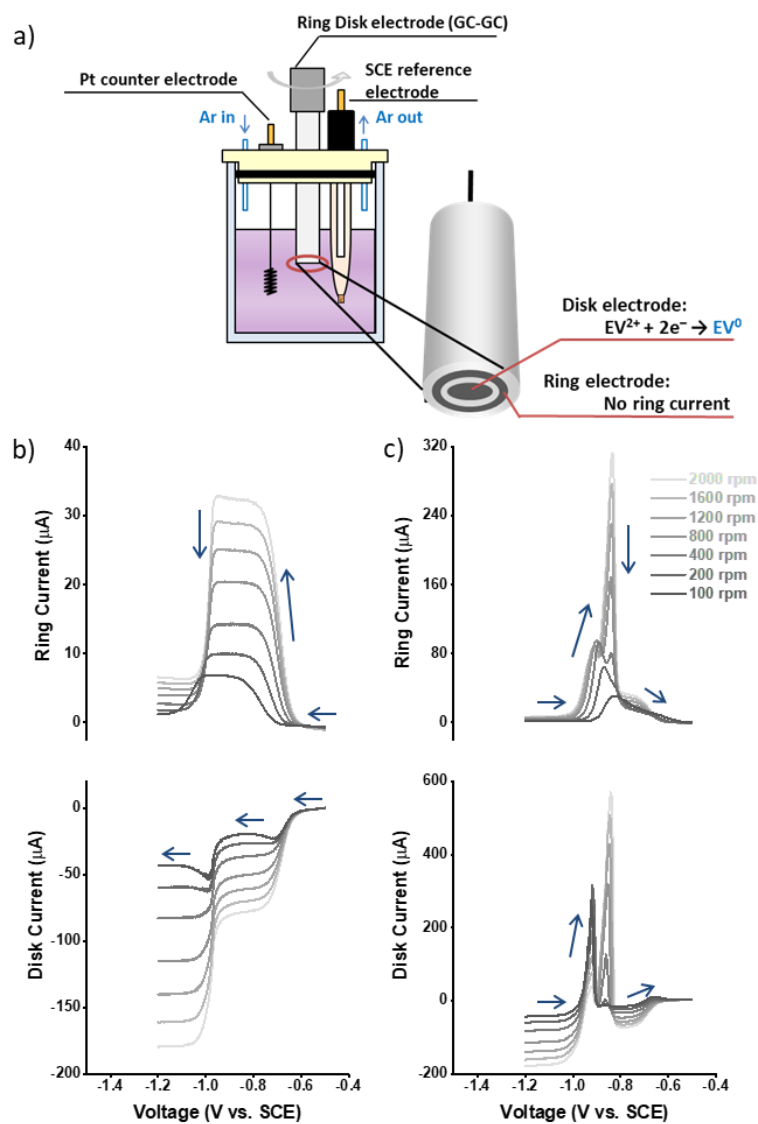

**Fig. S11** (a) The schematic representation of the RRDE test of EV when the disk potential is lower than  $-1.0$  V vs. SCE. RRDE of  $1$  mM EV in  $0.5$  M NaCl aqueous electrolyte during (b) the negative-going scan and (c) the positive-going scan. Ring and disk currents were recorded at  $50$   $\text{mV s}^{-1}$  with rotation rates between  $100$  and  $2000$  rpm and continuously holding the GC ring electrode at  $-0.5$  V vs. SCE.

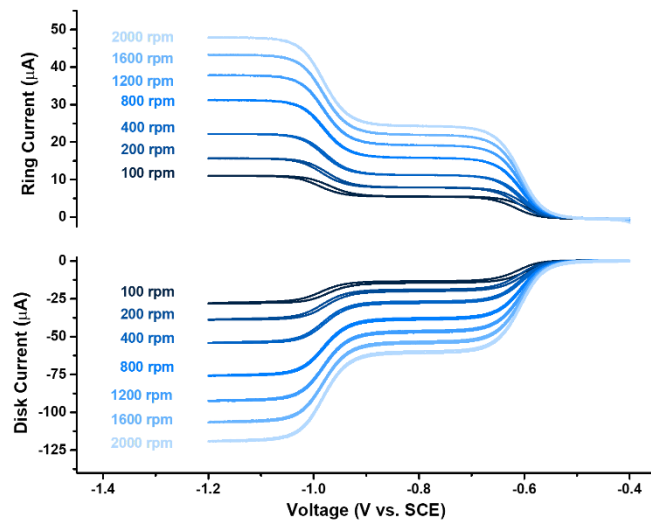

**Fig. S12** RRDE of 1 mM Vi-OEG3 in 0.5 M NaCl aqueous electrolyte. Ring and disk currents were recorded at  $5 \text{ mV s}^{-1}$  with rotation rates between 100 and 2000 rpm and continuously holding the GC ring electrode at  $-0.4 \text{ V vs. SCE}$ .

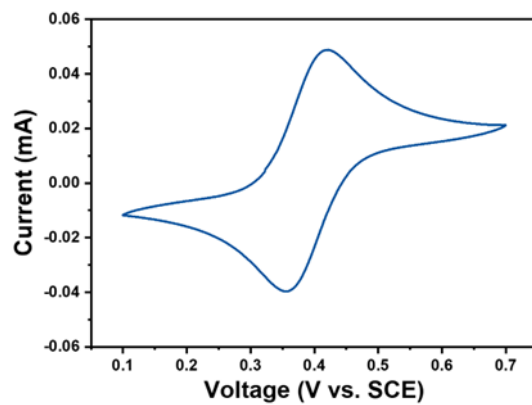

**Fig. S13** CV of FcNEBr. Condition: 5 mM FcNEBr in 0.5 M NaBr aqueous electrolyte at a scan rate of 50  $\text{mV s}^{-1}$ .

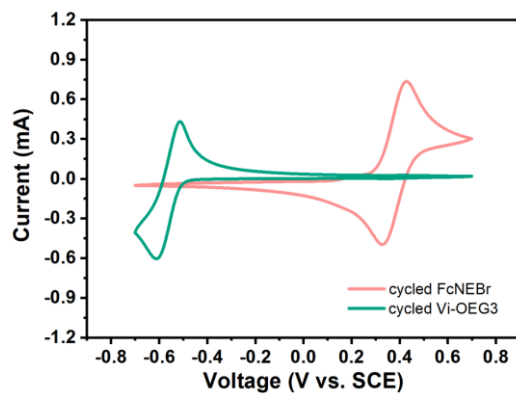

**Fig. S14** CV of electrolytes after cycling (0.5 M flow cell in Fig. 4).



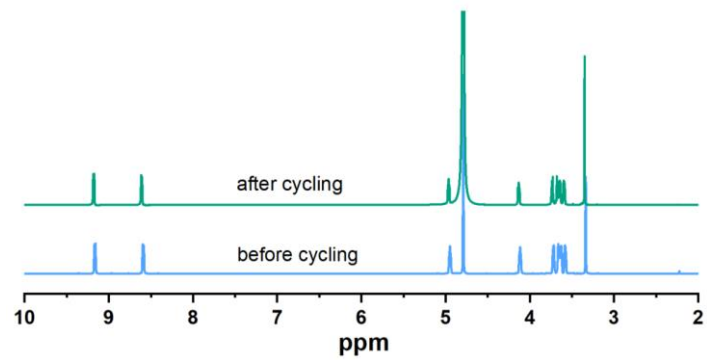

**Fig. S15** <sup>1</sup>H NMR of Vi-OEG3 negolytes before and after cycling (0.5 M flow cell in Fig. 4).

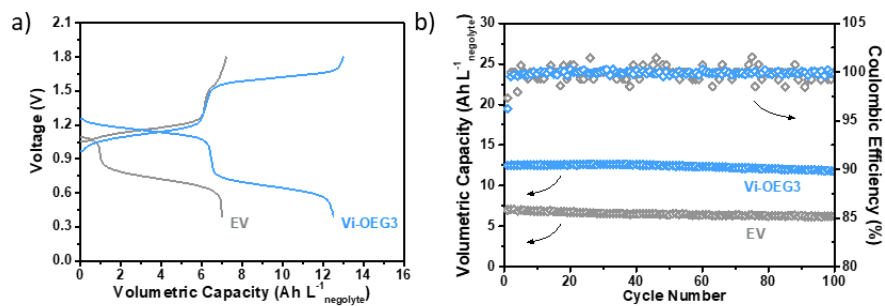

**Fig. S16** (a) Galvanostatic voltage profile of 0.25 M EV/0.5 M FcNEBr and 0.25 M Vi-OEG3/0.5 M FcNEBr static cell (1<sup>st</sup> cycle). (b) Cycling retention of volumetric capacity and coulombic efficiency of 0.25 M EV/0.5 M FcNEBr and 0.25 M Vi-OEG3/0.5 M FcNEBr static cell. Posolyte: 0.5 M FcNEBr in 1 M NaBr supporting electrolyte; Negolyte: 0.25 M EV or Vi-OEG3 in 1 M NaBr supporting electrolyte.

**Table S1.** Summary of state-of-the-art representative viologen-based AORFBs.

| electrolyte                                                                                                                |                                                                 | volume (mL) |          | cycling stability |            | E/P (h) <sup>a</sup> | ref.             |
|----------------------------------------------------------------------------------------------------------------------------|-----------------------------------------------------------------|-------------|----------|-------------------|------------|----------------------|------------------|
| posolyte                                                                                                                   | negolyte                                                        | posolyte    | negolyte | time (days)       | number     |                      |                  |
| 0.5 M TMAP-TEMPO in 1 M NaCl                                                                                               | 0.5 M BTMAP-Vi in 1 M NaCl                                      | 10          | 15       | ~ 3.4             | 200        | 0.2                  | 2                |
| 1.5 M TMAP-TEMPO in 4.5 M NaCl                                                                                             | 1.5 M BTMAP-Vi                                                  | 5           | 7.5      | ~ 7.2             | 250        | 0.34                 |                  |
| 2 M FcNCl                                                                                                                  | 2M BHOP-Vi                                                      | 10          | 5        | ~ 4.8             | 100        | 0.57                 | 3                |
| 0.5 M (NH <sub>4</sub> ) <sub>4</sub> [Fe(CN) <sub>6</sub> ]                                                               | 0.5 M (SPr) <sub>2</sub> V in 1.0 M NH <sub>4</sub> Cl          | 12          | 12       | ~ 4.6             | 300        | 0.18                 | 4                |
| 2.0 M KI in 2.0 M KCl                                                                                                      | 0.5 M (SPr) <sub>2</sub> V in 2.0 M KCl                         | 12          | 12       | ~ 4.6             | 300        | 0.18                 |                  |
| 0.3 M K <sub>4</sub> Fe(CN) <sub>6</sub> + 0.3 M K <sub>3</sub> Fe(CN) <sub>6</sub><br>in 2 m NH <sub>4</sub> Cl at pH = 9 | 1.0 M BPP-Vi titrated with 14 m<br>NH <sub>4</sub> OH to pH = 9 | 40          | 6.2      | ~ 13              | 280        | 0.56                 | 5                |
| 0.1 M BTMAP-Fc                                                                                                             | 0.1 M Dex-Vi in 1 M NaCl                                        | 10          | 5.5      | ~ 14              | 1200       | 0.14                 | 6                |
| 0.75 M BTMAP-Fc                                                                                                            | 1.5 M Dex-Vi                                                    | 15          | 5        | ~ 30              | 340        | 1.05                 |                  |
| 0.5 M FcNCl + 1 M NaCl                                                                                                     | 0.5 M BTMAE-Vi in 1 M NaCl                                      | 10          | 5        | ~ 1.6             | 200        | 0.1                  | 7                |
| <b>0.4 M FcNEBr + 1 M NaBr</b>                                                                                             | <b>0.5 M Vi-OEG3 + 1 M NaBr</b>                                 | <b>10</b>   | <b>5</b> | <b>~ 6</b>        | <b>138</b> | <b>0.52</b>          | <b>This work</b> |

<sup>a</sup> E/P represents the energy-to-power ratio, which is the discharge time duration of each cycle.

## References

1. W. Wang, N.-C. Lai, Z. Liang, Y. Wang and Y.-C. Lu, *Angewandte Chemie International Edition*, 2018, **57**, 5042-5046.
2. Y. Liu, M.-A. Goulet, L. Tong, Y. Liu, Y. Ji, L. Wu, R. G. Gordon, M. J. Aziz, Z. Yang and T. Xu, *Chem*, 2019, **5**, 1861-1870.
3. Y. Liu, Y. Li, P. Zuo, Q. Chen, G. Tang, P. Sun, Z. Yang and T. Xu, *ChemSusChem*, 2020, **13**, 2245-2249.
4. C. DeBruler, B. Hu, J. Moss, J. Luo and T. L. Liu, *ACS Energy Letters*, 2018, **3**, 663-668.
5. S. Jin, E. M. Fell, L. Vina-Lopez, Y. Jing, P. W. Michalak, R. G. Gordon and M. J. Aziz, *Advanced Energy Materials*, 2020, **10**, 2000100.
6. X.-L. Ly, P. Sullivan, H.-C. Fu, X. Hu, H. Liu, S. Jin, W. Li and D. Feng, *ACS Energy Letters*, 2022, **7**, 2428-2434.
7. K. Peng, P. Sun, Z. Yang and T. Xu, *Batteries & Supercaps*, 2023, **6**, e202200426.
